# Supplementary material
Source: PubMed Central journal article supplement (PMC7185451)
Supplement: mmc1.pdf [file mmc1.pdf]

## Spatial Approximations of Network-based Individual Level Infectious Disease Models - Supplemental Material

Table 1: Study one ( $\alpha = 0.4$  and infectious period=2) - Proportion of infection probability differences for susceptible individuals that exceed the cut of value of 0.1 for all network combinations of  $e_{in}$ ,  $e_{out}$  and  $r$ . Brackets contain corresponding standard errors across replications.

| $e_{in}$ | $e_{out}$ | $r$ | Network<br>ILM | Geometric<br>ILM   | Exponential<br>ILM | Constant<br>Piecewise Model | Homogeneous<br>Mixing Model |
|----------|-----------|-----|----------------|--------------------|--------------------|-----------------------------|-----------------------------|
| 0.3      | 0         | 3   | 0(0)           | 0.076928 (0.00347) | 0.083976 (0.00390) | 0.097952 (0.00475)          | 0.097952 (0.00249)          |
| 0.5      | 0         | 3   | 0(0)           | 0.095992 (0.00441) | 0.101336 (0.00451) | 0.111384 (0.00577)          | 0.092112 (0.00362)          |
| 0.7      | 0         | 3   | 0(0)           | 0.115024 (0.00495) | 0.108424 (0.00558) | 0.072192 (0.00430)          | 0.115472 (0.00459)          |
| 0.3      | 0.05      | 3   | 0(0)           | 0.792944 (0.02977) | 0.896376 (0.03558) | 0.931656 (0.04591)          | 0.886768 (0.07982)          |
| 0.5      | 0.05      | 3   | 0(0)           | 0.77748 (0.02050)  | 0.911376 (0.01424) | 0.933568 (0.04157)          | 0.968864 (0.02469)          |
| 0.7      | 0.05      | 3   | 0(0)           | 0.692648 (0.02218) | 0.833976 (0.01237) | 0.926744 (0.04435)          | 0.9722 (0.02300)            |
| 0.3      | 0.2       | 3   | 0(0)           | 0.622728 (0.00802) | 0.610992 (0.00741) | 0.516264 (0.12950)          | 0.600632 (0.00671)          |
| 0.5      | 0.2       | 3   | 0(0)           | 0.62684 (0.00753)  | 0.620736 (0.00811) | 0.489720 (0.13156)          | 0.606472 (0.00666)          |
| 0.7      | 0.2       | 3   | 0(0)           | 0.6416 (0.00669)   | 0.643376 (0.00728) | 0.551096 (0.12087)          | 0.6156 (0.00598)            |
| 0.3      | 0         | 5   | 0(0)           | 0.174816 (0.00607) | 0.183200 (0.00591) | 0.186096 (0.00782)          | 0.153208 (0.00436)          |
| 0.5      | 0         | 5   | 0(0)           | 0.211296 (0.00683) | 0.205888 (0.00681) | 0.211824 (0.00879)          | 0.210784 (0.00569)          |
| 0.7      | 0         | 5   | 0(0)           | 0.24124 (0.00797)  | 0.223040 (0.00730) | 0.188832 (0.00866)          | 0.255688 (0.00765)          |
| 0.3      | 0.05      | 5   | 0(0)           | 0.816744 (0.02034) | 0.860768 (0.01001) | 0.930744 (0.03883)          | 0.983528 (0.01031)          |
| 0.5      | 0.05      | 5   | 0(0)           | 0.832928 (0.01060) | 0.768968 (0.00753) | 0.887544 (0.03311)          | 0.990664 (0.00019)          |
| 0.7      | 0.05      | 5   | 0(0)           | 0.825 (0.00875)    | 0.756104 (0.00691) | 0.854936 (0.03552)          | 0.990696 (0.000200)         |
| 0.3      | 0.2       | 5   | 0(0)           | 0.631752 (0.00853) | 0.627112 (0.00886) | 0.566864 (0.12775)          | 0.60544 (0.00719)           |
| 0.5      | 0.2       | 5   | 0(0)           | 0.639504 (0.00718) | 0.652944 (0.00786) | 0.514904 (0.11935)          | 0.62912 (0.00704)           |
| 0.7      | 0.2       | 5   | 0(0)           | 0.648512 (0.00817) | 0.685688 (0.00870) | 0.551128 (0.10044)          | 0.72952 (0.01942)           |
| 0.3      | 0         | 7   | 0(0)           | 0.28804 (0.00694)  | 0.302312 (0.00714) | 0.326784 (0.01031)          | 0.267328 (0.00602)          |
| 0.5      | 0         | 7   | 0(0)           | 0.344096 (0.00898) | 0.332912 (0.00808) | 0.320176 (0.01262)          | 0.347056 (0.00865)          |
| 0.7      | 0         | 7   | 0(0)           | 0.377208 (0.00977) | 0.346880 (0.00800) | 0.236296 (0.01006)          | 0.403208 (0.01077)          |
| 0.3      | 0.05      | 7   | 0(0)           | 0.881624 (0.00837) | 0.816312 (0.00627) | 0.905352 (0.02889)          | 0.99072 (0.00021)           |
| 0.5      | 0.05      | 7   | 0(0)           | 0.839752 (0.00734) | 0.746984 (0.00695) | 0.816688 (0.02948)          | 0.96584 (0.00200)           |
| 0.7      | 0.05      | 7   | 0(0)           | 0.80792 (0.00684)  | 0.719096 (0.00628) | 0.758736 (0.02914)          | 0.890208 (0.01562)          |
| 0.3      | 0.2       | 7   | 0(0)           | 0.642864 (0.00773) | 0.644280 (0.00809) | 0.523040 (0.12210)          | 0.61308 (0.00724)           |
| 0.5      | 0.2       | 7   | 0(0)           | 0.651104 (0.00861) | 0.677320 (0.00903) | 0.455552 (0.12132)          | 0.710152 (0.01536)          |
| 0.7      | 0.2       | 7   | 0(0)           | 0.636312 (0.00721) | 0.644664 (0.00708) | 0.556584 (0.09400)          | 0.8278 (0.02874)            |

Table 2: Study two ( $\alpha = 0.4$  and infectious period=2) - Proportion of infection probability differences for susceptible individuals that exceed the cut of value of 0.1 for all network combinations of  $\Delta$ ,  $SS$  and  $n$ . Brackets contain corresponding standard errors across replications.

| Decay | SS | n  | Network<br>ILM | Geometric<br>ILM      | Exponential<br>ILM    | Constant<br>Piecewise Model | Homogeneous<br>Mixing Model |
|-------|----|----|----------------|-----------------------|-----------------------|-----------------------------|-----------------------------|
| 1.1   | 10 | 20 | 0 (0)          | 0.197432 (0.01873967) | 0.235720 (0.02265920) | 0.186000 (0.01431129)       | 0.898592 (0.01568763)       |
| 0.75  | 10 | 20 | 0 (0)          | 0.341320 (0.03212182) | 0.366936 (0.02901553) | 0.294048 (0.01875375)       | 0.836728 (0.02484755)       |
| 1.1   | 40 | 20 | 0 (0)          | 0.397536 (0.05269704) | 0.552104 (0.07613051) | 0.425248 (0.09318772)       | 0.858808 (0.02405734)       |
| 0.75  | 40 | 20 | 0 (0)          | 0.625320 (0.07367455) | 0.597120 (0.05345638) | 0.496744 (0.07218851)       | 0.800336 (0.03235120)       |
| 1.1   | 10 | 50 | 0 (0)          | 0.312808 (0.03736633) | 0.459680 (0.06372113) | 0.345032 (0.07490917)       | 0.882152 (0.01769037)       |
| 0.75  | 10 | 50 | 0 (0)          | 0.591672 (0.07010462) | 0.635448 (0.06015033) | 0.419432 (0.05006607)       | 0.808800 (0.02981668)       |
| 1.1   | 40 | 50 | 0 (0)          | 0.816840 (0.08444333) | 0.845776 (0.08037046) | 0.794488 (0.10245413)       | 0.774656 (0.03926014)       |
| 0.75  | 40 | 50 | 0 (0)          | 0.859696 (0.07326930) | 0.879416 (0.06321200) | 0.826304 (0.09105020)       | 0.746288 (0.04106505)       |

Decay: Spatial decay parameter ( $\Delta$ )

SS: Number of super-spreaders

n: Mean number of connecting individuals for each super-spreader

Table 3: Study one ( $\alpha = 0.1$  and infectious period=6) - Proportion of infection probability differences for susceptible individuals that exceed the cut of value of 0.1 for all network combinations of  $e_{in}$ ,  $e_{out}$  and  $r$ . Brackets contain corresponding standard errors across replications.

| $e_{in}$ | $e_{out}$ | $r$ | Network<br>ILM | Geometric<br>ILM    | Exponential<br>ILM | Constant<br>Piecewise Model | Homogeneous<br>Mixing Model |
|----------|-----------|-----|----------------|---------------------|--------------------|-----------------------------|-----------------------------|
| 0.3      | 0         | 3   | 0(0)           | 0.018856 (0.00158)  | 0.161536 (0.21127) | 0.010832 (0.00144)          | 0.010832 (0.00144)          |
| 0.5      | 0         | 3   | 0(0)           | 0.026656 (0.00170)  | 0.170720 (0.21059) | 0.007360 (0.00117)          | 0.024184 (0.0019)           |
| 0.7      | 0         | 3   | 0(0)           | 0.037616 (0.00216)  | 0.170680 (0.21059) | 0.004968 (0.00082)          | 0.041352 (0.0025)           |
| 0.3      | 0.05      | 3   | 0(0)           | 0.045024 (0.0032)   | 0.195160 (0.2087)  | 0.044544 (0.00328)          | 0.047648 (0.0034)           |
| 0.5      | 0.05      | 3   | 0(0)           | 0.050280 (0.0030)   | 0.207104 (0.2079)  | 0.050752 (0.00341)          | 0.064976 (0.00351)          |
| 0.7      | 0.05      | 3   | 0(0)           | 0.049992 (0.0031)   | 0.209280 (0.2077)  | 0.045152 (0.00319)          | 0.081464 (0.00421)          |
| 0.3      | 0.2       | 3   | 0(0)           | 0.320840 (0.01703)  | 0.449768 (0.1908)  | 0.256416 (0.02036)          | 0.287328 (0.03075)          |
| 0.5      | 0.2       | 3   | 0(0)           | 0.321488 (0.01680)  | 0.450752 (0.1911)  | 0.263304 (0.02411)          | 0.310856 (0.03135)          |
| 0.7      | 0.2       | 3   | 0(0)           | 0.320848 (0.0101)   | 0.464296 (0.1889)  | 0.285536 (0.02866)          | 0.324280 (0.02282)          |
| 0.3      | 0         | 5   | 0(0)           | 0.046344 (0.00260)  | 0.186184 (0.2094)  | 0.036632 (0.00255)          | 0.046936 (0.00301)          |
| 0.5      | 0         | 5   | 0(0)           | 0.082280 (0.00348)  | 0.205552 (0.2080)  | 0.028144 (0.00217)          | 0.093544 (0.00374)          |
| 0.7      | 0         | 5   | 0(0)           | 0.106464 (0.00381)  | 0.214024 (0.2074)  | 0.020344 (0.00172)          | 0.136968 (0.00418)          |
| 0.3      | 0.05      | 5   | 0(0)           | 0.073304 (0.00388)  | 0.220600 (0.2069)  | 0.071536 (0.0039)           | 0.086648 (0.0046)           |
| 0.5      | 0.05      | 5   | 0(0)           | 0.085352 (0.00403)  | 0.233496 (0.2059)  | 0.080416 (0.0040)           | 0.136784 (0.0053)           |
| 0.7      | 0.05      | 5   | 0(0)           | 0.090528 (0.00394)  | 0.255328 (0.2044)  | 0.065624 (0.0035)           | 0.180032 (0.0057)           |
| 0.3      | 0.2       | 5   | 0(0)           | 0.328616 (0.01337)  | 0.460216 (0.18977) | 0.291824 (0.0242)           | 0.312624 (0.0317)           |
| 0.5      | 0.2       | 5   | 0(0)           | 0.318656 (0.00885)  | 0.467928 (0.18872) | 0.269248 (0.0213)           | 0.350352 (0.0165)           |
| 0.7      | 0.2       | 5   | 0(0)           | 0.324208 (0.00756)  | 0.468384 (0.18861) | 0.292528 (0.0190)           | 0.393584 (0.0098)           |
| 0.3      | 0         | 7   | 0(0)           | 0.095216 (0.00410)  | 0.224768 (0.20659) | 0.065200 (0.0032)           | 0.101856 (0.0045)           |
| 0.5      | 0         | 7   | 0(0)           | 0.151232 (0.00517)  | 0.253256 (0.20449) | 0.058544 (0.0031)           | 0.187904 (0.0058)           |
| 0.7      | 0         | 7   | 0(0)           | 0.195584 (0.00567)  | 0.265904 (0.20356) | 0.040848 (0.0026)           | 0.256120 (0.0060)           |
| 0.3      | 0.05      | 7   | 0(0)           | 0.104632 (0.00452)  | 0.241776 (0.20534) | 0.105160 (0.0050)           | 0.139856 (0.0062)           |
| 0.5      | 0.05      | 7   | 0(0)           | 0.131664 (0.00429)  | 0.272536 (0.20309) | 0.120096 (0.0061)           | 0.233080 (0.0068)           |
| 0.7      | 0.05      | 7   | 0(0)           | 0.149936 (0.00536)  | 0.273176 (0.20309) | 0.081400 (0.0041)           | 0.268712 (0.0085)           |
| 0.3      | 0.2       | 7   | 0(0)           | 0.315408 (0.012684) | 0.450624 (0.19008) | 0.283080 (0.0220)           | 0.321072 (0.0251)           |
| 0.5      | 0.2       | 7   | 0(0)           | 0.315728 (0.006406) | 0.449264 (0.18997) | 0.306096 (0.0147)           | 0.391360 (0.0063)           |
| 0.7      | 0.2       | 7   | 0(0)           | 0.301864 (0.007013) | 0.440016 (0.19069) | 0.257272 (0.0108)           | 0.409264 (0.0120)           |

Table 4: Study two ( $\alpha = 0.1$  and infectious period=6) - Proportion of infection probability differences for susceptible individuals that exceed the cut of value of 0.1 for all network combinations of  $\Delta$ ,  $SS$  and  $n$ . Brackets contain corresponding standard errors across replications.

| Decay | SS | n  | Network<br>ILM | Geometric             | Exponential           | Constant              | Homogeneous            |
|-------|----|----|----------------|-----------------------|-----------------------|-----------------------|------------------------|
|       |    |    |                | ILM                   | ILM                   | Piecewise Model       | Mixing Model           |
| 1.1   | 10 | 20 | 0 (0)          | 0.143088 (0.01583652) | 0.144848 (0.01621333) | 0.142992 (0.01580001) | 0.952560 (0.006808888) |
| 0.75  | 10 | 20 | 0 (0)          | 0.365488 (0.04441304) | 0.431792 (0.05818432) | 0.335632 (0.03700054) | 0.913824 (0.018366843) |
| 1.1   | 40 | 20 | 0 (0)          | 0.190600 (0.02330336) | 0.198576 (0.02543271) | 0.188592 (0.02279059) | 0.949696 (0.008524688) |
| 0.75  | 40 | 20 | 0 (0)          | 0.282904 (0.03364194) | 0.303392 (0.03764487) | 0.284640 (0.03344915) | 0.932336 (0.014653183) |
| 1.1   | 10 | 50 | 0 (0)          | 0.144888 (0.01842389) | 0.146928 (0.01896299) | 0.143320 (0.01805624) | 0.950224 (0.007401508) |
| 0.75  | 10 | 50 | 0 (0)          | 0.260864 (0.02941257) | 0.278240 (0.03295736) | 0.264536 (0.02988084) | 0.933112 (0.013096005) |
| 1.1   | 40 | 50 | 0 (0)          | 0.288008 (0.03757680) | 0.292520 (0.03979529) | 0.273416 (0.03412023) | 0.928984 (0.013722091) |
| 0.75  | 40 | 50 | 0 (0)          | 0.442456 (0.06070293) | 0.511800 (0.07594442) | 0.406336 (0.05081276) | 0.901728 (0.021897844) |

Decay: Spatial decay parameter ( $\Delta$ )

SS: Number of super-spreaders

n: Mean number of connecting individuals for each super-spreader

Table 5: Study one ( $\alpha = 0.4$  and infectious period=2) posterior mean values for each fitted model, averaged over 10 epidemic replicates.

| $e_{in}$ | $e_{out}$ | $r$ | Network | $(\alpha)$ | Geometric ( $\gamma$ ) | Geometric ( $\delta$ ) | Exponential ( $\eta$ ) | Exponential ( $\lambda$ ) | Piecewise ( $\phi$ ) | Piecewise ( $\psi$ ) | Piecewise ( $\tau$ ) | Mixing ( $\omega$ ) |
|----------|-----------|-----|---------|------------|------------------------|------------------------|------------------------|---------------------------|----------------------|----------------------|----------------------|---------------------|
| 0.3      | 0         | 3   | 0.427   | 0.355      | 3.088                  | 0.735                  | 1.151                  | 0.104                     | 0.104                | 5.51E-06             | 3.081                | 0.002               |
| 0.5      | 0         | 3   | 0.412   | 0.756      | 3.359                  | 1.727                  | 1.273                  | 0.179                     | 0.179                | 5.52E-06             | 3.081                | 0.002               |
| 0.7      | 0         | 3   | 0.411   | 1.356      | 3.558                  | 3.09                   | 1.342                  | 0.267                     | 0.267                | 5.57E-06             | 3.081                | 0.002               |
| 0.3      | 0.05      | 3   | 0.403   | 0.093      | 0.614                  | 0.035                  | 0.045                  | 0.063                     | 0.063                | 0.016                | 2.691                | 0.02                |
| 0.5      | 0.05      | 3   | 0.419   | 0.169      | 0.833                  | 0.055                  | 0.068                  | 0.150                     | 0.150                | 0.013                | 2.859                | 0.023               |
| 0.7      | 0.05      | 3   | 0.403   | 0.311      | 1.143                  | 0.095                  | 0.117                  | 0.178                     | 0.178                | 0.015                | 2.828                | 0.024               |
| 0.3      | 0.2       | 3   | 0.412   | 0.141      | 0.255                  | 0.096                  | 0.022                  | 0.098                     | 0.098                | 0.055                | 3.955                | 0.072               |
| 0.5      | 0.2       | 3   | 0.413   | 0.171      | 0.305                  | 0.101                  | 0.023                  | 0.050                     | 0.050                | 0.061                | 5.84                 | 0.075               |
| 0.7      | 0.2       | 3   | 0.413   | 0.259      | 0.473                  | 0.12                   | 0.033                  | 0.201                     | 0.201                | 0.056                | 2.739                | 0.077               |
| 0.3      | 0         | 5   | 0.402   | 0.891      | 2.768                  | 0.779                  | 0.722                  | 0.1                       | 0.1                  | 1.11E-05             | 5.058                | 0.003               |
| 0.5      | 0         | 5   | 0.394   | 2.425      | 3.049                  | 2.001                  | 0.802                  | 0.176                     | 0.176                | 1.24E-05             | 5.049                | 0.004               |
| 0.7      | 0         | 5   | 0.388   | 3.922      | 3.183                  | 3.49                   | 0.851                  | 0.25                      | 0.25                 | 1.31E-05             | 5.067                | 0.004               |
| 0.3      | 0.05      | 5   | 0.395   | 0.205      | 0.917                  | 0.089                  | 0.107                  | 0.1062                    | 0.1062               | 0.012                | 4.365                | 0.024               |
| 0.5      | 0.05      | 5   | 0.405   | 0.391      | 1.148                  | 0.189                  | 0.171                  | 0.117                     | 0.117                | 0.018                | 4.965                | 0.031               |
| 0.7      | 0.05      | 5   | 0.4     | 0.592      | 1.28                   | 0.278                  | 0.197                  | 0.188                     | 0.188                | 0.016                | 4.312                | 0.034               |
| 0.3      | 0.2       | 5   | 0.42    | 0.179      | 0.325                  | 0.109                  | 0.028                  | 0.158                     | 0.158                | 0.057                | 3.209                | 0.074               |
| 0.5      | 0.2       | 5   | 0.408   | 0.292      | 0.472                  | 0.147                  | 0.044                  | 0.125                     | 0.125                | 0.049                | 6.282                | 0.079               |
| 0.7      | 0.2       | 5   | 0.417   | 0.496      | 0.692                  | 0.206                  | 0.065                  | 0.194                     | 0.194                | 0.037                | 6.691                | 0.088               |
| 0.3      | 0         | 7   | 0.408   | 0.98       | 2.22                   | 0.642                  | 0.488                  | 0.105                     | 0.105                | 9.04E-05             | 6.966                | 0.008               |
| 0.5      | 0         | 7   | 0.411   | 2.98       | 2.575                  | 1.666                  | 0.554                  | 0.182                     | 0.182                | 5.40E-05             | 7.009                | 0.008               |
| 0.7      | 0         | 7   | 0.405   | 5.374      | 2.821                  | 3.071                  | 0.61                   | 0.262                     | 0.262                | 3.32E-05             | 7.035                | 0.008               |
| 0.3      | 0.05      | 7   | 0.399   | 0.264      | 0.932                  | 0.139                  | 0.133                  | 0.081                     | 0.081                | 0.015                | 6.05                 | 0.03                |
| 0.5      | 0.05      | 7   | 0.404   | 0.6        | 1.186                  | 0.316                  | 0.19                   | 0.180                     | 0.180                | 0.014                | 5.943                | 0.039               |
| 0.7      | 0.05      | 7   | 0.414   | 1.058      | 1.393                  | 0.495                  | 0.217                  | 0.179                     | 0.179                | 0.018                | 6.196                | 0.042               |
| 0.3      | 0.2       | 7   | 0.424   | 0.196      | 0.346                  | 0.116                  | 0.03                   | 0.110                     | 0.110                | 0.055                | 3.823                | 0.078               |
| 0.5      | 0.2       | 7   | 0.391   | 0.373      | 0.584                  | 0.182                  | 0.058                  | 0.167                     | 0.167                | 0.048                | 5.383                | 0.086               |
| 0.7      | 0.2       | 7   | 0.41    | 0.335      | 0.519                  | 0.682                  | 0.257                  | 0.196                     | 0.196                | 0.039                | 6.209                | 1.106               |

Table 6: Study one ( $\alpha = 0.1$  and infectious period=6) posterior mean values for each fitted model, averaged over 10 epidemic replicates.

| $e_{in}$ | $e_{out}$ | $r$ | Network | $(\alpha)$ | Geometric ( $\gamma$ ) | Geometric ( $\delta$ ) | Exponential ( $\eta$ ) | Exponential ( $\lambda$ ) | Piecewise ( $\phi$ ) | Piecewise ( $\psi$ ) | Piecewise ( $\tau$ ) | Mixing ( $\omega$ ) |
|----------|-----------|-----|---------|------------|------------------------|------------------------|------------------------|---------------------------|----------------------|----------------------|----------------------|---------------------|
| 0.3      | 0         | 3   | 0.101   | 0.099      | 2.688                  | 0.204                  | 1.039                  | 0.035                     | 0                    | 3.11                 | 0.002                |                     |
| 0.5      | 0         | 3   | 0.106   | 0.169      | 3.128                  | 0.342                  | 1.145                  | 0.049                     | 0                    | 3.08                 | 0.001                |                     |
| 0.7      | 0         | 3   | 0.102   | 0.242      | 3.195                  | 0.482                  | 1.151                  | 0.069                     | 0                    | 3.081                | 0.001                |                     |
| 0.3      | 0.05      | 3   | 0.1     | 0.029      | 0.665                  | 0.01                   | 0.045                  | 0.034                     | 0.004                | 3.034                | 0.006                |                     |
| 0.5      | 0.05      | 3   | 0.1     | 0.057      | 0.967                  | 0.016                  | 0.074                  | 0.058                     | 0.005                | 2.925                | 0.006                |                     |
| 0.7      | 0.05      | 3   | 0.101   | 0.1        | 1.212                  | 0.039                  | 0.151                  | 0.079                     | 0.004                | 3.065                | 0.007                |                     |
| 0.3      | 0.2       | 3   | 0.098   | 0.045      | 0.319                  | 0.026                  | 0.023                  | 0.055                     | 0.018                | 4.04                 | 0.019                |                     |
| 0.5      | 0.2       | 3   | 0.098   | 0.053      | 0.362                  | 0.028                  | 0.026                  | 0.061                     | 0.019                | 3.724                | 0.02                 |                     |
| 0.7      | 0.2       | 3   | 0.103   | 0.088      | 0.547                  | 0.034                  | 0.035                  | 0.12                      | 0.019                | 3.08                 | 0.022                |                     |
| 0.3      | 0         | 5   | 0.101   | 0.161      | 2.383                  | 0.147                  | 0.623                  | 0.027                     | 0                    | 5.087                | 0.002                |                     |
| 0.5      | 0         | 5   | 0.102   | 0.325      | 2.549                  | 0.29                   | 0.658                  | 0.048                     | 0                    | 5.079                | 0.002                |                     |
| 0.7      | 0         | 5   | 0.098   | 0.449      | 2.519                  | 0.413                  | 0.662                  | 0.067                     | 0                    | 5.058                | 0.003                |                     |
| 0.3      | 0.05      | 5   | 0.101   | 0.057      | 0.886                  | 0.025                  | 0.106                  | 0.03                      | 0.005                | 5.172                | 0.007                |                     |
| 0.5      | 0.05      | 5   | 0.101   | 0.116      | 1.169                  | 0.062                  | 0.186                  | 0.055                     | 0.005                | 4.948                | 0.009                |                     |
| 0.7      | 0.05      | 5   | 0.101   | 0.142      | 1.169                  | 0.072                  | 0.178                  | 0.067                     | 0.005                | 4.974                | 0.011                |                     |
| 0.3      | 0.2       | 5   | 0.101   | 0.052      | 0.344                  | 0.03                   | 0.028                  | 0.048                     | 0.019                | 4.473                | 0.02                 |                     |
| 0.5      | 0.2       | 5   | 0.098   | 0.08       | 0.498                  | 0.036                  | 0.037                  | 0.076                     | 0.019                | 4.184                | 0.022                |                     |
| 0.7      | 0.2       | 5   | 0.103   | 0.112      | 0.591                  | 0.054                  | 0.058                  | 0.084                     | 0.021                | 4.564                | 0.025                |                     |
| 0.3      | 0         | 7   | 0.102   | 0.224      | 2.105                  | 0.142                  | 0.45                   | 0.029                     | 0                    | 6.91                 | 0.003                |                     |
| 0.5      | 0         | 7   | 0.1     | 0.421      | 2.187                  | 0.269                  | 0.472                  | 0.05                      | 0                    | 6.844                | 0.004                |                     |
| 0.7      | 0         | 7   | 0.102   | 0.649      | 2.239                  | 0.398                  | 0.475                  | 0.07                      | 0                    | 6.955                | 0.005                |                     |
| 0.3      | 0.05      | 7   | 0.102   | 0.074      | 0.912                  | 0.034                  | 0.114                  | 0.031                     | 0.005                | 6.603                | 0.009                |                     |
| 0.5      | 0.05      | 7   | 0.102   | 0.157      | 1.161                  | 0.075                  | 0.171                  | 0.049                     | 0.005                | 6.937                | 0.012                |                     |
| 0.7      | 0.05      | 7   | 0.101   | 0.275      | 1.361                  | 0.14                   | 0.226                  | 0.069                     | 0.005                | 6.948                | 0.014                |                     |
| 0.3      | 0.2       | 7   | 0.1     | 0.067      | 0.46                   | 0.037                  | 0.045                  | 0.061                     | 0.019                | 4.914                | 0.021                |                     |
| 0.5      | 0.2       | 7   | 0.104   | 0.089      | 0.489                  | 0.051                  | 0.053                  | 0.059                     | 0.021                | 5.561                | 0.026                |                     |
| 0.7      | 0.2       | 7   | 0.103   | 0.152      | 0.696                  | 0.079                  | 0.083                  | 0.077                     | 0.019                | 6.798                | 0.028                |                     |

Table 7: Study two ( $\alpha = 0.4$  and infectious period=2) posterior mean values for each fitted model, averaged over 10 epidemic replicates.

| Decay | SS | n  | Network ( $\alpha$ ) | Geometric ( $\gamma$ ) | Geometric ( $\delta$ ) | Exponential ( $\eta$ ) | Exponential ( $\lambda$ ) | Piecewise ( $\phi$ ) | Piecewise ( $\psi$ ) | Piecewise ( $\tau$ ) | Mixing ( $\omega$ ) |
|-------|----|----|----------------------|------------------------|------------------------|------------------------|---------------------------|----------------------|----------------------|----------------------|---------------------|
| 1.1   | 10 | 20 | 0.403                | 0.102                  | 2.182                  | 0.088                  | 0.559                     | 0.048                | 0.001                | 2.727                | 0.002               |
| 0.75  | 10 | 20 | 0.398                | 0.221                  | 2.189                  | 0.183                  | 0.545                     | 0.064                | 0.001                | 3.872                | 0.003               |
| 1.1   | 40 | 20 | 0.399                | 0.07                   | 1.538                  | 0.026                  | 0.205                     | 0.048                | 0.002                | 2.685                | 0.003               |
| 0.75  | 40 | 20 | 0.415                | 0.171                  | 1.72                   | 0.107                  | 0.347                     | 0.076                | 0.002                | 3.609                | 0.005               |
| 1.1   | 10 | 50 | 0.403                | 0.062                  | 1.563                  | 0.02                   | 0.199                     | 0.041                | 0.001                | 2.937                | 0.003               |
| 0.75  | 10 | 50 | 0.401                | 0.148                  | 1.693                  | 0.07                   | 0.289                     | 0.057                | 0.002                | 3.965                | 0.005               |
| 1.1   | 40 | 50 | 0.403                | 0.058                  | 1.052                  | 0.018                  | 0.103                     | 0.056                | 0.004                | 2.903                | 0.005               |
| 0.75  | 40 | 50 | 0.398                | 0.134                  | 1.313                  | 0.047                  | 0.163                     | 0.065                | 0.005                | 4.221                | 0.008               |

Decay: Spatial decay parameter ( $\Delta$ )

SS: Number of super-spreaders

n: Mean number of connecting individuals for each super-spreader

Table 8: Study two ( $\alpha = 0.1$  and infectious period=6) posterior mean values for each fitted model, averaged over 10 epidemic replicates.

| Decay | SS | n  | Network ( $\alpha$ ) | Geometric ( $\gamma$ ) | Geometric ( $\delta$ ) | Exponential ( $\eta$ ) | Exponential ( $\lambda$ ) | Piecewise ( $\phi$ ) | Piecewise ( $\psi$ ) | Piecewise ( $\tau$ ) | Mixing ( $\omega$ ) |
|-------|----|----|----------------------|------------------------|------------------------|------------------------|---------------------------|----------------------|----------------------|----------------------|---------------------|
| 1.1   | 10 | 20 | 0.097                | 0.03                   | 2.292                  | 0.038                  | 0.667                     | 0.015                | 0                    | 2.634                | 0.001               |
| 0.75  | 10 | 20 | 0.102                | 0.041                  | 1.437                  | 0.021                  | 0.227                     | 0.023                | 0.001                | 3.303                | 0.002               |
| 1.1   | 40 | 20 | 0.101                | 0.022                  | 1.644                  | 0.014                  | 0.317                     | 0.013                | 0                    | 2.773                | 0.001               |
| 0.75  | 40 | 20 | 0.101                | 0.046                  | 1.742                  | 0.034                  | 0.394                     | 0.019                | 0.001                | 3.705                | 0.001               |
| 1.1   | 10 | 50 | 0.098                | 0.022                  | 1.775                  | 0.014                  | 0.362                     | 0.017                | 0                    | 2.3                  | 0.001               |
| 0.75  | 10 | 50 | 0.1                  | 0.052                  | 1.917                  | 0.034                  | 0.412                     | 0.02                 | 0                    | 3.742                | 0.001               |
| 1.1   | 40 | 50 | 0.102                | 0.019                  | 1.177                  | 0.006                  | 0.109                     | 0.02                 | 0.001                | 2.44                 | 0.001               |
| 0.75  | 40 | 50 | 0.103                | 0.033                  | 1.247                  | 0.013                  | 0.155                     | 0.019                | 0.001                | 4.159                | 0.002               |

Decay: Spatial decay parameter ( $\Delta$ )

SS: Number of super-spreaders

n: Mean number of connecting individuals for each super-spreader

Table 9: Study one ( $\alpha = 0.4$  and infectious period=2) - Mean predicted squared error of each model's posterior predictive distribution of the epidemic timeline.

| $e_{in}$ | $e_{out}$ | $r$ | Network<br>ILM | Exponential<br>ILM | Geometric<br>ILM | Constant<br>Piecewise Model | Homogeneous<br>Mixing Model |
|----------|-----------|-----|----------------|--------------------|------------------|-----------------------------|-----------------------------|
| 0.3      | 0         | 3   | 104.87532      | 250.71984          | 664.48438        | 170.95916                   | 626.74684                   |
| 0.5      | 0         | 3   | 91.55352       | 199.23172          | 783.22278        | 141.54484                   | 735.0067                    |
| 0.7      | 0         | 3   | 46.9904        | 144.40476          | 807.15038        | 91.07132                    | 951.02606                   |
| 0.3      | 0.05      | 3   | 169.87912      | 1444.79946         | 2843.6856        | 395.36976                   | 273.27856                   |
| 0.5      | 0.05      | 3   | 135.51264      | 1373.26774         | 1878.1785        | 247.84552                   | 172.77944                   |
| 0.7      | 0.05      | 3   | 190.67568      | 2139.8333          | 1425.63944       | 227.39568                   | 273.96224                   |
| 0.3      | 0.2       | 3   | 24.53568       | 212.47448          | 1050.69648       | 191.86792                   | 30.62704                    |
| 0.5      | 0.2       | 3   | 11.888         | 198.80992          | 1092.11726       | 199.98216                   | 16.65832                    |
| 0.7      | 0.2       | 3   | 9.90632        | 250.53472          | 1286.43094       | 140.12976                   | 17.234                      |
| 0.3      | 0         | 5   | 109.24528      | 292.24792          | 981.80338        | 152.39428                   | 1624.42924                  |
| 0.5      | 0         | 5   | 71.428         | 237.70936          | 1072.28278       | 108.88884                   | 2690.6297                   |
| 0.7      | 0         | 5   | 36.55784       | 254.45912          | 1140.48888       | 86.62424                    | 3286.1421                   |
| 0.3      | 0.05      | 5   | 110.28984      | 1488.89868         | 1610.4234        | 340.40456                   | 205.08752                   |
| 0.5      | 0.05      | 5   | 176.14208      | 966.51356          | 929.32342        | 446.9764                    | 376.6768                    |
| 0.7      | 0.05      | 5   | 132.19552      | 837.0448           | 914.22496        | 512.09792                   | 591.5307                    |
| 0.3      | 0.2       | 5   | 14.84232       | 262.54256          | 1032.18732       | 134.67968                   | 23.69672                    |
| 0.5      | 0.2       | 5   | 10.14952       | 222.72104          | 897.73078        | 151.58648                   | 12.50376                    |
| 0.7      | 0.2       | 5   | 6.66184        | 255.55792          | 575.94032        | 148.09528                   | 10.32384                    |
| 0.3      | 0         | 7   | 85.43872       | 346.81056          | 642.51026        | 138.27944                   | 3037.4766                   |
| 0.5      | 0         | 7   | 61.02184       | 240.71368          | 722.182          | 75.172                      | 3554.323                    |
| 0.7      | 0         | 7   | 31.8604        | 251.66968          | 944.3105         | 42.80536                    | 4766.2764                   |
| 0.3      | 0.05      | 7   | 190.85448      | 1177.96728         | 1432.18108       | 529.24408                   | 536.78528                   |
| 0.5      | 0.05      | 7   | 114.59976      | 784.19184          | 848.65684        | 414.07824                   | 489.71062                   |
| 0.7      | 0.05      | 7   | 100.41624      | 517.59464          | 594.30884        | 277.06224                   | 436.73232                   |
| 0.3      | 0.2       | 7   | 9.99152        | 232.43824          | 997.77596        | 154.80576                   | 14.06312                    |
| 0.5      | 0.2       | 7   | 7.35336        | 260.07552          | 756.08704        | 142.74896                   | 8.17072                     |
| 0.7      | 0.2       | 7   | 6.50176        | 115.50864          | 411.1036         | 114.25792                   | 7.98224                     |



Table 10: Study one ( $\alpha = 0.1$  and infectious period=6) - Mean predicted squared error of each model's posterior predictive distribution of the epidemic timeline.

| $e_{in}$ | $e_{out}$ | $r$ | Network<br>ILM | Exponential<br>ILM | Geometric<br>ILM | Constant<br>Piecewise Model | Homogeneous<br>Mixing Model |
|----------|-----------|-----|----------------|--------------------|------------------|-----------------------------|-----------------------------|
| 0.3      | 0         | 3   | 109.14268      | 316.9646           | 750.07354        | 406.5467                    | 1815.98998                  |
| 0.5      | 0         | 3   | 91.19692       | 194.69556          | 329.42864        | 116.60696                   | 461.7524                    |
| 0.7      | 0         | 3   | 105.47076      | 208.88552          | 443.848          | 125.1858                    | 494.07236                   |
| 0.3      | 0.05      | 3   | 561.53964      | 1774.0816          | 3250.4425        | 812.65378                   | 602.5113                    |
| 0.5      | 0.05      | 3   | 602.93826      | 2452.8663          | 2908.8496        | 780.63334                   | 670.67946                   |
| 0.7      | 0.05      | 3   | 799.96828      | 3417.674           | 2211.3354        | 962.44946                   | 914.04888                   |
| 0.3      | 0.2       | 3   | 200.97368      | 958.63762          | 3137.0109        | 457.19792                   | 214.18832                   |
| 0.5      | 0.2       | 3   | 200.0212       | 925.01202          | 3013.7681        | 421.4212                    | 189.85328                   |
| 0.7      | 0.2       | 3   | 174.4196       | 1134.82674         | 3149.4272        | 272.45144                   | 182.71704                   |
| 0.3      | 0         | 5   | 262.80864      | 500.41044          | 500.26396        | 286.22072                   | 1195.52494                  |
| 0.5      | 0         | 5   | 171.68756      | 423.69276          | 629.03448        | 205.94164                   | 1575.743                    |
| 0.7      | 0         | 5   | 185.64196      | 352.54296          | 634.11974        | 206.27784                   | 2251.1914                   |
| 0.3      | 0.05      | 5   | 480.48032      | 2054.506           | 2308.9122        | 818.94912                   | 767.928                     |
| 0.5      | 0.05      | 5   | 605.5378       | 2159.3549          | 1727.8883        | 720.59876                   | 592.74988                   |
| 0.7      | 0.05      | 5   | 698.5409       | 1957.04806         | 1687.7811        | 851.93838                   | 875.44742                   |
| 0.3      | 0.2       | 5   | 210.35224      | 974.9011           | 3209.5036        | 361.22616                   | 208.99568                   |
| 0.5      | 0.2       | 5   | 230.08296      | 1447.4107          | 3703.0591        | 435.62568                   | 235.95112                   |
| 0.7      | 0.2       | 5   | 352.30256      | 1643.1372          | 2836.5559        | 711.53356                   | 368.98176                   |
| 0.3      | 0         | 7   | 415.3078       | 678.09976          | 605.97034        | 447.55296                   | 1264.51806                  |
| 0.5      | 0         | 7   | 293.57912      | 549.29016          | 705.11362        | 309.70256                   | 2157.84084                  |
| 0.7      | 0         | 7   | 192.98272      | 391.15664          | 531.86896        | 205.47704                   | 2603.002                    |
| 0.3      | 0.05      | 7   | 453.47448      | 1950.5349          | 2297.6996        | 837.66796                   | 573.68028                   |
| 0.5      | 0.05      | 7   | 653.87544      | 1610.34834         | 1550.25078       | 833.61094                   | 831.27652                   |
| 0.7      | 0.05      | 7   | 243.63656      | 795.3454           | 823.89612        | 344.82896                   | 584.46212                   |
| 0.3      | 0.2       | 7   | 165.84         | 1253.1019          | 3101.1475        | 590.56586                   | 166.96904                   |
| 0.5      | 0.2       | 7   | 218.27104      | 1502.6933          | 2512.3826        | 480.2092                    | 236.28504                   |
| 0.7      | 0.2       | 7   | 187.73192      | 1044.0874          | 1719.5858        | 329.13888                   | 224.85456                   |

Table 11: Study two ( $\alpha = 0.4$  and infectious period=2) - Mean predicted squared error of each model's posterior predictive distribution of the epidemic timeline.

| Decay | SS | n  | Network<br>ILM | Exponential<br>ILM | Geometric<br>ILM | Constant<br>Piecewise Model | Homogeneous<br>Mixing Model |
|-------|----|----|----------------|--------------------|------------------|-----------------------------|-----------------------------|
| 1.1   | 10 | 20 | 724.70006      | 898.0427           | 883.28132        | 848.79252                   | 925.36234                   |
| 0.75  | 10 | 20 | 557.06274      | 861.10574          | 781.90782        | 875.97304                   | 995.84058                   |
| 1.1   | 40 | 20 | 1107.98756     | 2229.754           | 1656.6507        | 1401.69226                  | 1214.84544                  |
| 0.75  | 40 | 20 | 1024.25084     | 1538.65876         | 1312.56724       | 972.30796                   | 1008.46384                  |
| 1.1   | 10 | 50 | 768.72694      | 1649.5091          | 1627.8166        | 1050.95052                  | 1524.61164                  |
| 0.75  | 10 | 50 | 764.52282      | 1738.0608          | 1603.0957        | 1633.15254                  | 1593.6054                   |
| 1.1   | 40 | 50 | 1308.86472     | 2090.1276          | 2662.7003        | 1469.96692                  | 1361.20008                  |
| 0.75  | 40 | 50 | 1951.11042     | 3157.8822          | 3080.1744        | 2874.17612                  | 2815.53768                  |

Decay: Spatial decay parameter ( $\Delta$ )

SS: Number of super-spreaders

n: Mean number of connecting individuals for each super-spreader

Table 12: Study two ( $\alpha = 0.1$  and infectious period=6) - Mean predicted squared error of each model's posterior predictive distribution of the epidemic timeline.

| Decay | SS | n  | Network<br>ILM | Exponential<br>ILM | Geometric<br>ILM | Constant<br>Piecewise Model | Homogeneous<br>Mixing Model |
|-------|----|----|----------------|--------------------|------------------|-----------------------------|-----------------------------|
| 1.1   | 10 | 20 | 135.83392      | 238.44756          | 195.31092        | 179.27744                   | 183.26708                   |
| 0.75  | 10 | 20 | 885.6794       | 1818.92052         | 1665.75954       | 1545.28118                  | 1583.03278                  |
| 1.1   | 40 | 20 | 433.28084      | 1021.08318         | 726.46956        | 686.88376                   | 670.27302                   |
| 0.75  | 40 | 20 | 713.96744      | 1207.83728         | 1023.886         | 966.50584                   | 925.0106                    |
| 1.1   | 10 | 50 | 367.405        | 684.61118          | 582.23292        | 631.20976                   | 624.64656                   |
| 0.75  | 10 | 50 | 540.59756      | 832.36092          | 638.89292        | 590.12128                   | 594.70092                   |
| 1.1   | 40 | 50 | 1700.45874     | 1714.2029          | 1718.5377        | 1530.5662                   | 1594.9081                   |
| 0.75  | 40 | 50 | 968.21896      | 1696.6774          | 1660.5845        | 1070.37046                  | 928.24234                   |

Decay: Spatial decay parameter ( $\Delta$ )

SS: Number of super-spreaders

n: Mean number of connecting individuals for each super-spreader
